# Supplementary material for: Tailoring the structural and electronic properties of an SnSe2/MoS2 van der Waals heterostructure with an electric field and the insertion of a graphene sheet
Source: Royal Society of Chemistry journal article supplement (doi:10.1039/c9cp04689e), 2019-01-01
Supplement: c9cp04689e1.pdf [file c9cp04689e1.pdf]

Supporting Information (SI)

**Tailoring the structural and electronic properties of SnSe<sub>2</sub>/MoS<sub>2</sub> van der Waals heterostructure by electric field and the insertion of graphene sheet**

Tuan V. Vu<sup>1,2</sup>, Nguyen V. Hieu<sup>3</sup>, Le T. P. Thao<sup>3</sup>,  
Nguyen N. Hieu<sup>4</sup>, Huynh V. Phuc<sup>5</sup>, H. D. Bui<sup>4,\*</sup>, M. Idrees<sup>6</sup>, Bin Amin<sup>7</sup>, Le M. Duc<sup>8</sup>,  
Chuong V. Nguyen<sup>8,\*</sup>

*<sup>1</sup>Division of Computational Physics, Institute for Computational Science,  
Ton Duc Thang University, Ho Chi Minh City, Vietnam*

*<sup>2</sup>Faculty of Electrical & Electronics Engineering, Ton Duc Thang University, Ho Chi Minh City, Vietnam*

*<sup>3</sup>Department of Physics, University of Education, The University of Da Nang, Da Nang, Vietnam*

*<sup>4</sup>Institute of Research and Development, Duy Tan University, Da Nang 550000, Vietnam*

*<sup>5</sup>Division of Theoretical Physics, Dong Thap University, Cao Lanh 870000, Vietnam*

*<sup>6</sup>Department of Physics, Hazara University, Mansehra 21300, Pakistan*

*<sup>7</sup>Department of Physics, Abbottabad University of Science and Technology, Abbottabad  
22010, Pakistan*

*<sup>8</sup>Department of Materials Science and Engineering, Le Quy Don Technical University,  
Ha Noi, Vietnam*

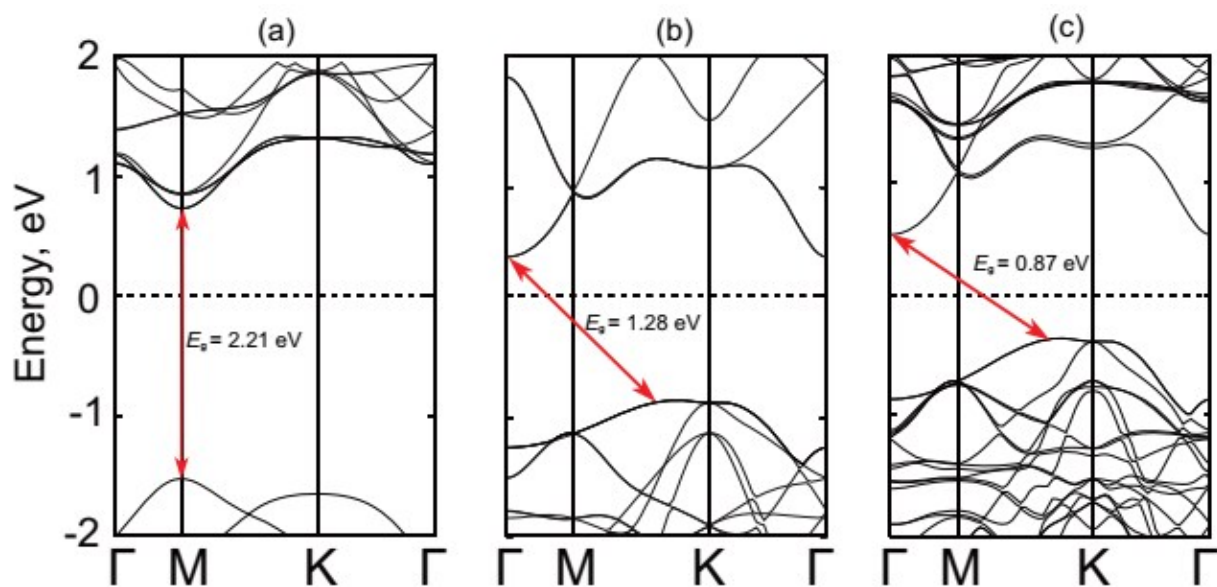

Fig. S1. Band structures of (a) MoS<sub>2</sub>, (b) SnSe<sub>2</sub>, and (c) SnSe<sub>2</sub>/MoS<sub>2</sub> vdWH given by HSE06 method.

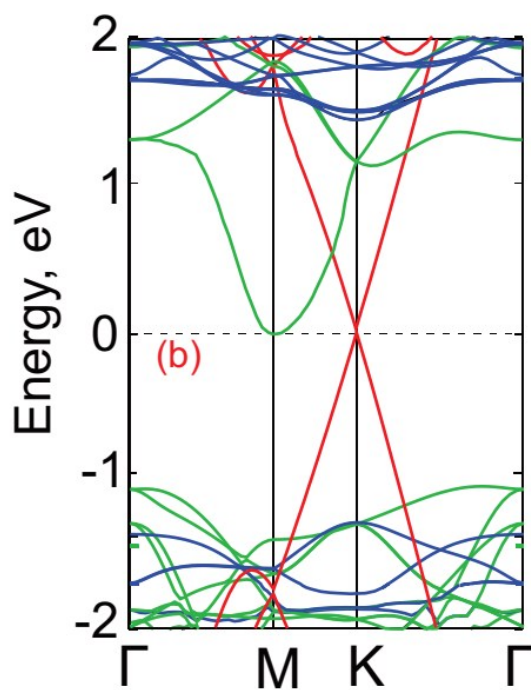

Fig. S2. Projected band structure of the SnSe<sub>2</sub>/G/MoS<sub>2</sub> vdWH given by HSE06 method.
